# Supplementary material
Source: Springer Nature journal article supplement (https://www.springermedizin.de/resource/supplementary/12884_2007_2_MOESM4_ESM.pdf/9459754)

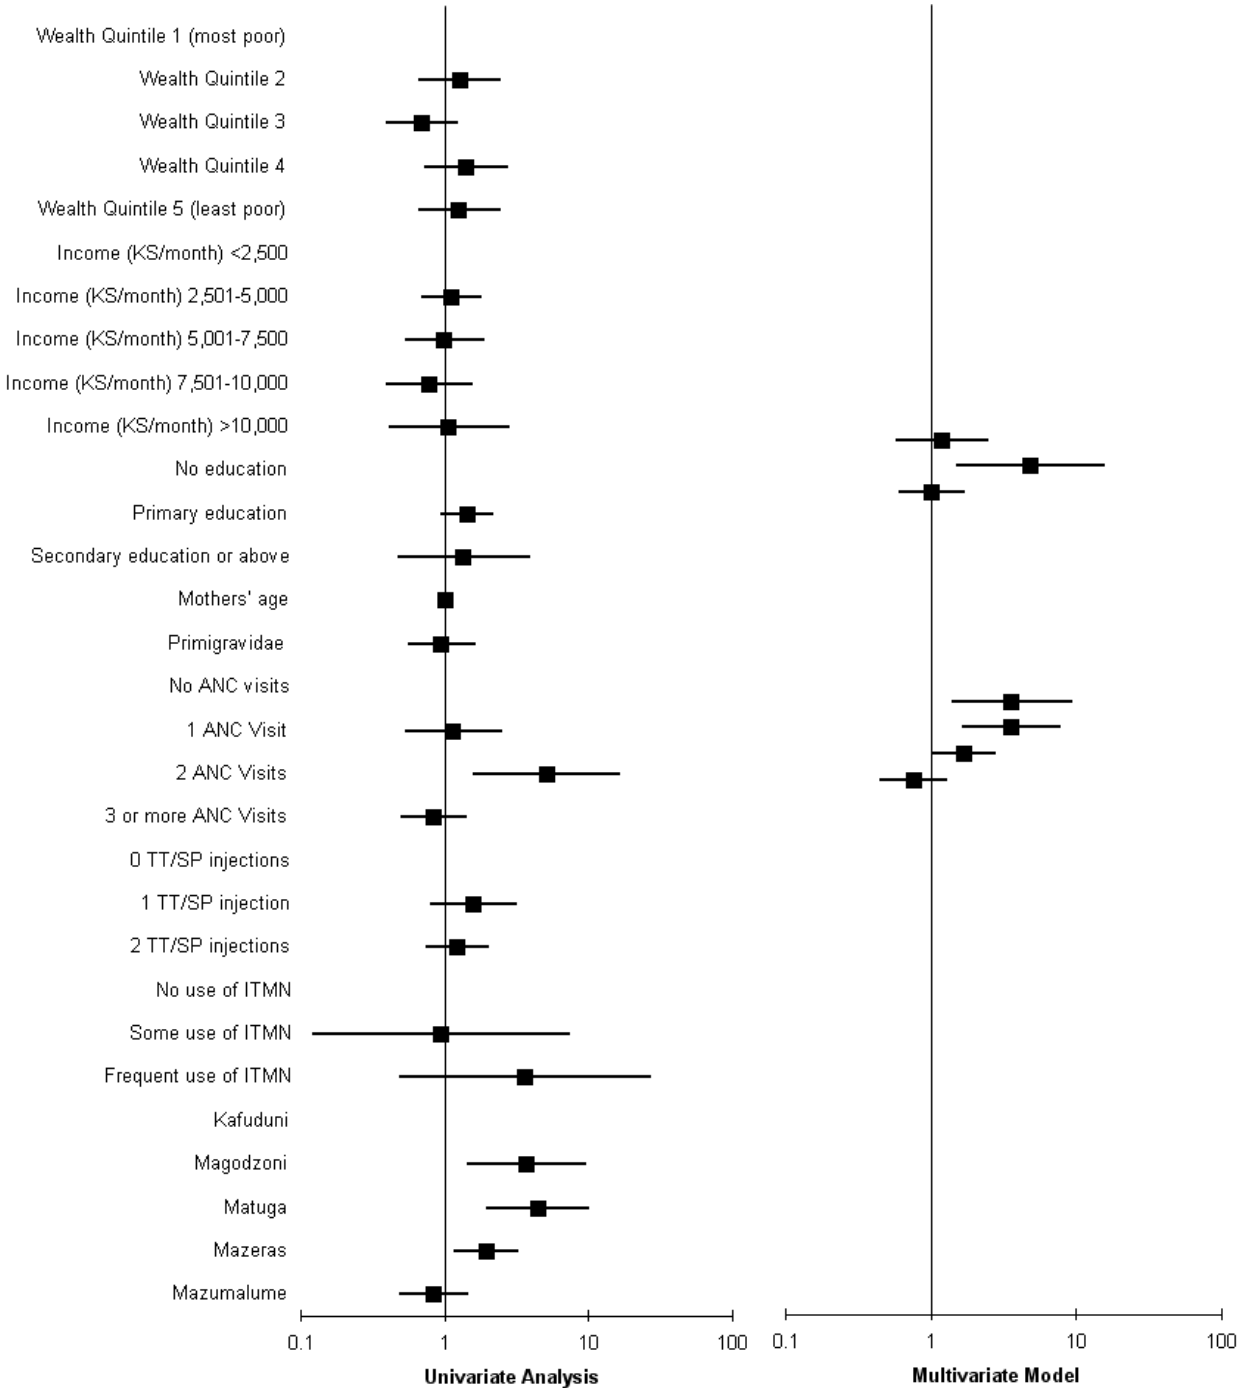

Odds Ratio (95% CI) – Logarithmic Scale

Supplement: MOESM4 [file 9459754]
